# Supplementary material for: Global and regional phosphorus budgets in agricultural systems and their implications for phosphorus-use efficiency
Source: Copernicus journal article supplement (doi:10.5194/essd-2017-41), 2017-06-06
Supplement: Supplementary file [file essd-2017-41-AC2-supplement.zip]

## **Supporting Information**

### **1. Global P budgets in agricultural systems and their implications for phosphorus-use efficiency**

Our study concentrated on global and regional P budgets in agriculture and their phosphorus-use efficiency (PUE) in four main agricultural subsystems: cropland, managed grassland (hereafter, pasture), livestock, and humans. The specific P pools in this study were phosphate rock, phosphates produced from that rock, the atmosphere, pasture, livestock, cropland, harvested crops, humans, and the environment. The inputs and outputs for each P pool are described below.

#### **1.1 Phosphate Rock**

As a non-renewable resource, phosphate rock is the main source for most of the P that humans use (Liu *et al.*, 2008). Mined phosphate rock is processed into phosphates (section 1.2) for subsequent use. Data for the annual quantities of mined phosphates were obtained from the International Fertilizer Industry Association (IFA; <http://www.fertilizer.org/Statistics>), which provided the data for global and regional levels (expressed as the  $P_2O_5$  equivalent). The annual amount of P that is mined can be calculated from the proportion of the P in the  $P_2O_5$  equivalent.

#### **1.2 Phosphates**

The P in phosphates is used in phosphate fertilizer, feed additives, detergents, and other uses. The Food and Agriculture Organization (FAO; <http://www.fao.org/faostat/en/#home>) provides the annual consumption of phosphate fertilizer for each country. Some of the phosphate fertilizer is applied to pasture in some

countries (mainly in Europe), and FAO (2002) estimated the consumption of phosphate fertilizer by cropland and pasture in each country. Thus, from this information, we can estimate the amounts of phosphate fertilizer applied to cropland and pasture. In addition, 8% of the global mined phosphate is used in feed additives, and the remainder of the phosphate is used in detergents or other uses for humans (Ringeval *et al.*, 2014).

### **1.3 Atmosphere**

The P input from the atmosphere refers to the atmospheric P deposition in cropland and pasture areas, whereas anthropogenic P outputs comes from the burning of crop residues and bioenergy within the agricultural system. All these inputs and outputs were estimated by using the PKU-FUEL model (Wang *et al.*, 2014, 2015). Wang *et al.* (2014) used the global 3D atmospheric transport model LMDz-INCA to simulate the transport and deposition of aerosols from different sources, with specific reference to the P concentration. The modeled P deposition maps agreed well with P deposition observed at 121 stations worldwide (Wang *et al.*, 2015).

### **1.4 Cropland and harvested crops**

In addition to application of phosphate fertilizer and atmospheric P deposition, cropland P inputs also come from livestock manure and human excreta (as sewage sludge), as well as recycled crop residues. Cropland P outputs include P removals in harvested biomass (crops and crop residues) and P output by leaching or erosion.

#### **1.4.1 Cropland P inputs**

The application of phosphate fertilizer and atmospheric deposition have been presented above. Manure P inputs from livestock and humans are described in sections

1.4.5 and 1.4.6, whereas P in recycled crop residues is presented in section 1.4.2.

#### 1.4.2 Cropland P outputs

Crops are the economically valuable outputs of cropland. FAO provided data for the 224 (Table SI-1) countries for the production of 178 crops (Table SI-2) that we included in our analysis. We grouped these crops into 13 types: wheat, rice, maize, other cereals, soybeans, palm oils, other oil crops, sugar crops, fibers, roots and tubers, vegetables, fruit, and other crops. The distributions of the harvested crops were also obtained from FAOSTAT, including crops that produced human food, livestock feed, industrial processing, wastes, and other uses. Feed crops flow directly into the livestock subsystem, and the remaining crops flow into the human subsystem. P in harvested crops can be estimated by multiplying their biomass production by their P content (COMIFER, 2007; USDA-NRCS, 2009; Waller, 2010). In addition, crop residues are also important for P removal from cropland. Half of the crop residues are returned to cropland as fertilizer, and 25% are used as livestock fodder (Liu *et al.*, 2008). Of the remaining 25% of crop residues, some proportion is burned, and can be estimated by the PKU-FUEL model, and the remainder is transferred to the human subsystem. FAOSTAT provides the amount of crop residues that are recycled to cropland, so we can estimate P in these crop residues by multiplying the amount of residues by the corresponding P content. Based on the distribution of crop residues, we can estimate the P flows in harvested crop residues. The global P loss from leaching and runoff was estimated by Bouwman *et al.* (2013), who noted that these losses account for approximately 12.5% of the total P inputs in agricultural land. Thus, we used 12.5% of

all P inputs in agricultural land to represent the leaching and runoff loss of P.

#### 1.4.3 Cropland soil P budget

The cropland soil P budget ( $\Delta P$ ) refers to the balance between all P inputs and all P outputs for cropland.

#### 1.4.4 Pasture

For pasture, the P inputs are from livestock manure, phosphate fertilizer, and atmospheric deposition. Harvested grass is the economically valuable product removed from pasture, but leaching also results in a P loss from pasture. The data on production of grass as livestock feed was obtained from Herrero *et al.* (2013) and ORCHIDEE-GM (Chang *et al.*, 2013, 2015). The P content of the grass was estimated at 0.19 to 0.56% of its biomass (Antikainen *et al.*, 2005; COMIFER, 2007; USDA-NRCS, 2009; Waller, 2010); we chose the midpoint of this range (0.38%) as the P content of grass in our study. Based on this P content, we estimated the P content in harvested grass. The pasture P budget ( $\Delta P$ ) was then estimated as the balance between its total P inputs and total P outputs.

#### 1.4.5 Livestock

The stock of P in livestock does not change substantially over time, so we assumed that livestock P inputs equaled livestock P outputs.

Livestock P outputs include P in livestock economic products (meat, eggs, and milk) and P in manure (Table SI-3). FAOSTAT provided the data for the production of meat, eggs, and milk for 16 types of animals. We used the P contents of meat, eggs, and milk from Grote *et al.* (2005) to estimate the P stocks in the livestock products.

FAOSTAT estimated the amount of nitrogen in manure, as well as its distribution to pasture, to cropland as manure, and to the environment as waste. Thus, using P:N ratios for manure of different animals (MWPS-18, 1985; OECD Secretariat, 1991; Levington Agriculture, 1997; Sheldrick *et al.*, 2003; ASAE, 2005), we estimated the P flows in livestock manure.

Livestock P inputs include grass from pasture, crops, and crop residues from cropland, as well as feed additives from phosphate and processed feed from wasted human food. Therefore, the P in the feed processed from human food can be calculated by subtracting the other P inputs from the livestock total P outputs.

#### 1.4.6 Humans

As in the analysis for livestock, we assumed that total P inputs equal total P outputs for humans. All inputs have been described above. Human P outputs consist of food processed to provide livestock feed, transfer of excreta to cropland as sewage sludge, biomass combustion for energy, and wastes released into the environment. The total amount of P in human excreta can be estimated by multiplying the human population by the per capita annual amount of P in human excreta (Smil, 2000; Cordell *et al.*, 2009). Liu *et al.* (2008) reported that 30% of human excreta in urban areas and 70% of human excreta in rural areas is currently recycled to cropland. Thus, based on these proportions, we can calculate the amount of P in human manure that is contributed to cropland. The total amount of P released into the environment as waste can be estimated by subtracting the other human P outputs from the total human P inputs.

#### 1.4.7 Environment

The P inputs to the environment include P leaching or runoff from agricultural soils and P flows into the environment as waste from humans. These values are described earlier in this section.

For the methods described in the following sections, details of the components of the equations are presented in Table SI-4.

## 2. Annual P budgets of cropland and pasture soils

Annual changes in soil P (the soil P budget,  $\Delta P$ ) are calculated as the differences between annual inputs and outputs:

$$\Delta P_{\text{cropland}} = (P_{\text{fer-crop}} + P_{\text{dep-crop}} + P_{\text{man-crop}} + P_{\text{slu-crop}} + P_{\text{res-rec}} + P_{\text{crop-seed}}) - (P_{\text{crop}} + P_{\text{crop-res}} + P_{\text{runoff-crop}})$$

(Eq. 1)

$$\Delta P_{\text{pasture}} = (P_{\text{fer-pas}} + P_{\text{dep-pas}} + P_{\text{man-pas}}) - (P_{\text{grass}} + P_{\text{runoff-pas}}) \quad (\text{Eq. 2})$$

where  $\Delta P_{\text{cropland}}$  and  $\Delta P_{\text{pasture}}$  are annual soil budgets for cropland and pasture, respectively;  $P_{\text{fer-crop}}$  and  $P_{\text{fer-pas}}$  are the corresponding phosphate fertilizer applications;  $P_{\text{dep-crop}}$  and  $P_{\text{dep-pas}}$  are the corresponding atmospheric P deposition fluxes; and  $P_{\text{man-crop}}$  and  $P_{\text{man-pas}}$  are the corresponding livestock manure fluxes applied to cropland and pasture.  $P_{\text{slu-crop}}$  is the input as human sewage sludge, which is only applied to cropland;  $P_{\text{res-rec}}$  is the input of P from recycled crop residues returned to cropland;  $P_{\text{crop-seed}}$  is the P in seeds;  $P_{\text{crop}}$  and  $P_{\text{crop-res}}$  are P removals in harvested crop biomass and crop residues, respectively;  $P_{\text{grass}}$  is the P removed in the intake of grass by animals; and  $P_{\text{runoff-crop}}$  and  $P_{\text{runoff-pas}}$  are losses of dissolved and particulate P to bodies of water from cropland and pasture, respectively. All units for these fluxes are in kg P ha<sup>-1</sup> yr<sup>-1</sup> or Tg P yr<sup>-1</sup>, depending on the area or period they describe.

### 3. Annual P budgets of cropland and pasture soils

We defined the annual labile P inputs ( $P_{\text{labile-input}}$ ) and stable P inputs ( $P_{\text{stable-input}}$ ) as:

$$P_{\text{labile-input}} = 0.8 \cdot P_{\text{Inputs}} \quad (\text{Eq. 3})$$

$$P_{\text{stable-input}} = 0.2 \cdot P_{\text{Inputs}} \quad (\text{Eq. 4})$$

where  $P_{\text{Inputs}}$  represents the sum of all input fluxes in the first term on the right side of Eq. 1, excluding  $P_{\text{crop-seed}}$ . If  $P_{\text{labile-input}} \geq P_{\text{removal}}$ , with  $P_{\text{removal}}$  being the sum of removals as  $P_{\text{crop}}$ ,  $P_{\text{crop-res}}$ , and  $P_{\text{runoff-crop}}$  for cropland and the sum of removals as  $P_{\text{pasture}}$  and  $P_{\text{runoff-pasture}}$  for pasture, the surplus labile P input is transferred to the stable P pool at the end of each year. Given the stable P losses by leaching or runoff ( $P_{\text{runoff}}$ ), the soil P export and the budget of the stable soil P pool are given by:

$$P_{\text{soil-exp}} = P_{\text{runoff}} \quad (\text{Eq. 5})$$

$$\Delta P_{\text{stable}} = P_{\text{stable-input}} + P_{\text{labile-input}} - P_{\text{removal}} - P_{\text{runoff}} \quad (\text{Eq. 6})$$

If  $P_{\text{labile-input}} < P_{\text{removal}}$ , there is no transfer of labile P into the stable P pool, but the extra P demand for crop biomass is satisfied by a transfer from the pool of stable P. In this case, the soil P balance includes P lost by leaching or runoff into bodies of water and the surplus labile P is incorporated in crop biomass from the stable P pool:

$$P_{\text{soil-exp}} = P_{\text{runoff}} + (P_{\text{removal}} + P_{\text{labile-input}}) \quad (\text{Eq. 7})$$

Thus, the net annual soil-P budget can be estimated by:

$$\Delta P = \Delta P_{\text{stable}} + P_{\text{seed}} \quad (\text{Eq. 8})$$

### 4. Human and livestock P budgets

We assumed that the stocks of P in living livestock, in livestock products, and in human bodies were constant over time. Total annual P inputs for humans and livestock

must then equal their P outputs each year, which defines the mass-balance equations for these two subsystems:

$$P_{grass} + P_{feed-add} + P_{pro-feed} + P_{crop-feed} + P_{res-add} = P_{man} + P_{meat} + P_{egg} + P_{milk} \quad (\text{Eq. 9})$$

$$P_{crop-hum} + P_{res-add} + P_{meat} + P_{egg} + P_{milk} + P_{other} = P_{pro-feed} + P_{bioenergy} + P_{hum-env} + P_{slu-crop}$$

(Eq. 10)

where  $P_{meat}$ ,  $P_{egg}$ , and  $P_{milk}$  are the P fluxes associated with meat, eggs, and milk consumed by humans, respectively, and  $P_{grass}$ ,  $P_{feed-add}$ ,  $P_{crop-feed}$ ,  $P_{res-feed}$ , and  $P_{pro-feed}$  represent the ingestion of P by animals from grazed grass biomass, feed additives, crop biomass and residue feed, and feed from food not consumed by humans (see Fig. 1);  $P_{man}$  is the total flux of P rejected by animals in the form of manure delivered to both cropland and pasture;  $P_{crop-hum}$  defines the P input to humans from cropland, and represents the consumption of crop products;  $P_{cropres-hum}$  represents the P flux in crop residues used by humans to generate bioenergy;  $P_{other}$  represents the P input flux to humans directly from minerals (detergents and other non-fertilizer products);  $P_{bioene}$  is P lost from humans to the environment from the use of biofuels harvested from crops (thus, not including wood bioenergy);  $P_{slu-crop}$  is the input as human sewage sludge, which is only applied to cropland; and  $P_{hum-env}$  is the remainder of the P flux lost in human sewage, calculated as the amount that remains after accounting for the other terms.

## 5. Phosphorus-use efficiencies

The PUE of cropland ( $\epsilon_{cropland}$ ), pasture ( $\epsilon_{pasture}$ ), and livestock ( $\epsilon_{livestock}$ ) is defined as:



$$\varepsilon_{cropland} = \frac{P_{crop}}{P_{fer-crop} + P_{man-crop} + P_{slu-crop} + P_{dep-crop}} \quad (\text{Eq. 11})$$

$$\varepsilon_{pasture} = \frac{P_{grass}}{P_{fer-pas} + P_{man-pas} + P_{dep-pas}} \quad (\text{Eq. 12})$$

$$\varepsilon_{livestock} = \frac{P_{meat} + P_{egg} + P_{milk}}{P_{grass} + P_{feed-add} + P_{crop-feed} + P_{res-feed} + P_{pro-feed}} \quad (\text{Eq. 13})$$

We defined the PUE of human food ( $\varepsilon_{food}$ ) as the ratio of P in human excreta to the total of all P inputs in human food. This represents an exception to our definition, since human excreta have no economic value.

$$\varepsilon_{food} = \frac{P_{excreta-hum}}{P_{crop-food} + P_{meat} + P_{egg} + P_{milk}} \quad (\text{Eq. 14})$$

Finally, we defined the P yield of livestock products per unit area of pasture ( $YP_{lp-pasture}$ ) as:

$$YP_{lp-pasture} = \frac{P_{meat} + P_{egg} + P_{milk}}{A_{pasture}} \times \frac{P_{grass}}{P_{liv-input}} \quad (\text{Eq. 15})$$

where  $A_{pasture}$  is the area of pasture in a given region and  $P_{liv-input}$  refers to all livestock P inputs, including grazed grass from pasture, crops used as feed, and animal feed additives from phosphates given by humans to livestock.

## 6. International trade dependency ratio

The P fluxes associated with the international trade of fertilizers, food, feed, and fiber commodities can also be associated with dependency ratios. The fertilizer import P-dependency ratio ( $F_{fer}$ ) is expressed as the ratio of P in imported fertilizers ( $P_{fer-imp}$ ) to P in all fertilizers ( $P_{fer-con}$ ) consumed by a country:

$$F_{fer} = \frac{P_{fer-imp}}{P_{fer-con}} \quad (\text{Eq. 16})$$

The food import dependency ratio ( $F_{\text{food}}$ ) is expressed as the ratio of P in food imports ( $P_{\text{food-imp}}$ ) to P in all food consumed in one country:

$$F_{\text{food}} = \frac{P_{\text{food-imp}}}{P_{\text{food-pro}} + P_{\text{food-imp}} - P_{\text{food-exp}}} \quad (\text{Eq. 17})$$

The proportion of imports ( $F_{\text{total}}$ ) is expressed as the ratio of total P imported as fertilizers and food to the total P in fertilizers and food:

$$F_{\text{total}} = \frac{P_{\text{fer-imp}} + P_{\text{food-imp}}}{P_{\text{fer-con}} + P_{\text{food-pro}} + P_{\text{food-imp}} - P_{\text{food-exp}}} \quad (\text{Eq. 18})$$

## 7. Comparisons at a national level

We estimated the flows of P in traded food and fertilizer for the United States, for China, for Australia and France, and for Japan from in 2010 (Fig SI-1). We chose these countries because they were representative of the combinations of fertilizer exporter or importer with food exporter or importer. We then compared our results with those in previous reports.

### 7.1 United States

The United States is an important exporter of food and phosphate fertilizer. Suh and Yee (2011) reported a net P export in food of 413 Gg P in 2007, which is slightly lower than the value of 435 Gg P in 2010 in our study. They estimated the net export of phosphate fertilizer as 1291 Gg P in 2007, which is slightly higher than the value of 1196 Gg P in 2010 in our study. The net export of food increased slightly from 2002 to 2010, whereas exports of phosphate fertilizer have decreased.

### 7.2 China

Chinese food imports have been increasing due to population growth and dietary

changes in China, especially in recent years, and food security is therefore a potentially serious problem in China. The trade in phosphate fertilizer changed greatly during the study period. Before 2007, China depended strongly on imported phosphate fertilizer, with a decreasing trend. However, China became a large exporter of phosphate fertilizer after 2007, with the exports increasing thereafter. If this trend continues, a P scarcity could develop in China. Our results indicated that the soil P accumulation in wheat cropland ( $29.4 \text{ kg P ha yr}^{-1}$ ) was higher than the national level of  $25.42 \text{ kg P ha yr}^{-1}$ . However, the accumulation of P in rice and maize fields was lower than the national average (Ma *et al.*, 2011).

### 7.3 Australia and France

Australia and France both have relatively stable food exports, with about  $100 \text{ Tg P yr}^{-1}$  stored in food. Both countries import phosphate fertilizer, but at decreasing rates. Both countries are main crop exporters. Senthilkumar *et al.* (2012) reported that France imported  $113 \text{ Gg P yr}^{-1}$  in crops and feed and  $318 \text{ Gg P yr}^{-1}$  of phosphate fertilizer from 2002 to 2006, compared with  $26 \text{ Gg P yr}^{-1}$  in food and feed and  $271.4 \text{ Gg P yr}^{-1}$  in fertilizer in our study. France also exported  $133 \text{ Gg P yr}^{-1}$  in food and feed and  $29.8 \text{ Gg P yr}^{-1}$  in phosphate fertilizer during the same period, compared with  $122$  and  $25.4 \text{ Gg P yr}^{-1}$ , respectively, in our study. The main differences may be because we did not account for the international trade of grass feed. Cordell *et al.* (2013) reported that Australia imported a net amount of  $115 \text{ Gg P yr}^{-1}$  of phosphate fertilizer and exported a net amount of  $106 \text{ Gg yr}^{-1}$  in crops, compared with  $102$  and  $45 \text{ Gg yr}^{-1}$ , respectively in our study.

#### 7.4 Japan

Japan depends strongly on imported food and phosphate fertilizer from other countries. P in the imported food remained steady at around 110 Gg P yr<sup>-1</sup> in Japan. Although most of the applied phosphate fertilizer was obtained from other countries, Japan's cropland PUE was low, leading to a serious problem of soil P accumulation in cropland. Because the government is aware of the problem, they have made an effort to increase cropland PUE, which increased from 15.7% in 1985 to 20.1% in 2005 (Mishima *et al.*, 2010). This is close to our result (20% in 2002 to 23% in 2010); thus, the net imports of phosphate fertilizer have decreased in Japan.

#### 8. Comparisons of PUE

We defined PUE as the ratio of the economic P outputs to the total P inputs. Because the economic output differs among commodities, PUE is unique to each commodity. Table SI-6 presents the values for cropland as a whole, by region and globally, and Table SI-7 presents the values for individual crops. For pasture, the harvest P output equals the total P output, and does not account for loss of soil P by leaching or runoff into bodies of water. For cropland, P in the harvested crops was defined as the economic P output, excluding the P in crop residues. For livestock, the economic P outputs only include P embodied in livestock products. However, some portion of the livestock manure is accounted for as P inputs to cropland and pasture. We calculated PUE as follows:

**Cropland total PUE:** the ratio of P outputs in harvested crops and crop residues to total P inputs into cropland

**Cropland PUE:** the ratio of P outputs in harvested crops to total P inputs into cropland (i.e., excluding crop residues)

Figure SI-2 presents the relationship between cropland total PUE and cropland PUE.

**Livestock total PUE:** the ratio of P outputs in livestock products and in the recycled manure transferred to cropland and pasture to the total P inputs into livestock

**Livestock PUE:** the ratio of P outputs in livestock products to the total P inputs into livestock (i.e., excluding recycled manure)

### **8.1 Cropland PUE**

Cropland total PUE had a strong and significant linear relationship with cropland PUE (Fig. SI-2). Global cropland total PUE was estimated to be 0.76, which was 1.65 times the global cropland PUE (excluding crop residues) of 0.46. However, with different crop harvest index values, cropland total PUEs and PUEs (excluding residues) differed among the regions (Table SI-6). The ratio of cropland total PUE to cropland PUE was relatively high in Southern and Southeastern Asia, northern Africa, and North America, and was relatively low in the Caribbean and Central America and South America. The cropland PUE was 0.67 when the cropland soil P balance was neutral because parts of the P output (i.e., the residues) are not considered. There was more recycling of P than loss of P in surface runoff into bodies of water. Thus, cropland total PUE should be more than 1 when the cropland soil P balance is neutral.

Substantial differences in PUE and total PUE occurred among crops because of their different harvest indices, yields, and external P inputs (Table SI-7). Oil palm, fiber,

fruits, and vegetable crops had very low total PUE, and therefore a low total PUE to PUE ratio ( $<1.2$ ) because few of their P inputs flowed into their crop biomass. In contrast, the remaining crop types (excluding the “other” category) had high total PUE because more of their P was transferred into the crop and crop residues, leading to a high total PUE to PUE ratio ( $>1.3$ ). Furthermore, P inputs did not meet the P demand for wheat and other cereals. However, due to their low harvest index, cereals produced a large amount of crop residues; hence, their PUE was much lower than their total PUE, especially for rice and maize. For the “other” category, there was no difference between PUE and total PUE because there was little production of residues.

Based on the available data, it was not possible to determine the source of the cropland P (i.e., manure or mineral fertilizer) that was lost into bodies of water. Thus, it is hard to define a PUE term that accounts for the impacts of different fertilizer types. Since this is an important problem for managing P inputs and outputs in agricultural ecosystems, further research will be necessary to clarify the relationships between cropland total PUE and PUE for different crops, and how they are affected by human and natural factors.

## **8.2 Livestock PUE**

Because livestock total PUE includes P in recycled manure, its global value (0.83) was far higher than the global livestock PUE (excluding manure) of 0.06 (Table SI-6). These two PUE parameters differed greatly among the regions due to differences in the mixture and quantity of different livestock species, different livestock husbandry methods, and different manure management methods. The yield of livestock products

was very low in African countries, resulting in low livestock PUE. However, almost all their manure was applied to agricultural land as an important P input, leading to much higher livestock total PUE ( $\geq 0.92$ ) than in other regions. Therefore, it will be necessary for African countries to find ways to increase the economic value of livestock outputs while continuing to use manure efficiently to relieve the pressure on global sources of phosphates. In contrast, efficient livestock husbandry allowed a higher proportion of P inputs to flow into livestock products in Eastern Asia and Europe ( $\geq 9.9\%$ ) than in Africa ( $< 2\%$ ). However, as the application of phosphate fertilizer increased, the proportion of livestock manure recycled into agricultural soils decreased. Consequently, livestock total PUE was relatively low in Eastern Asia and Europe; this represents a waste of the livestock manure resource and excessive application of phosphate fertilizer. Therefore, countries in Eastern Asia and Europe should look for ways to increase their use of livestock manure.

## References

- Antikainen R, Lemola R, Nousiainen J *et al.* (2005) Stocks and flows of nitrogen and phosphorus in the Finnish food production and consumption system. *Agriculture, Ecosystems and Environment*, **107**, 287-305.
- ASAE (2005) Manure production and characteristics. Report D384.2, American Society of Agricultural Engineers, St. Joseph, MI, USA.
- Bouwman L, Goldewijk KK, Van Der Hoek KW *et al.* (2013) Exploring global changes in nitrogen and phosphorus cycles in agriculture induced by livestock production over the 1900-2500 period. *Proceedings of the National Academy of Sciences of the United States of America*, **110**, 20882-20887.
- Chang J, Viovy N, Vuichard N *et al.* (2013) Incorporating grassland management in ORCHIDE: model description and evaluation at 11 eddy-covariance sites in Europe. *Geoscience Model Development*, **6**, 2165–2181.
- Chang JF, Viovy N, Vuichard N *et al.* (2015) Modeled changes in potential grassland productivity and in ruminant livestock density in Europe over 1961-2010. *PLOS ONE*, **10**, e0127554, doi: 10.1371/journal.pone.0127554.
- COMIFER (2007) Teneur en P, K et Mg des organes végétaux récoltés pour les cultures de plein champ et les principaux fourrages. Comité Français d'Étude et de Développement de la Fertilisation Raisonnée, Paris. (in French)
- Cordell D, Drangert J, White S (2009) The story of phosphorus: global food security and food for thought. *Global Environmental Change*, **19**, 292-305.
- Cordell D, Jackson M, White S (2013) Phosphorus flows through the Australian food



341 system: identifying intervention points as a roadmap to phosphorus security.

342 *Environmental Science & Policy*, **29**, 87-102.FAO (2002) Fertilizer Use by Crop

343 (5<sup>th</sup> Edition), Food and Agriculture Organization of the United Nations, Rome.

344 Grote U, Craswell E, Vlek P (2005) Nutrient flows in international trade: ecology and

345 policy issues. *Environmental Science & Policy*, **8**, 439-451.

346 Herrero M, Havlik P, Valin H *et al.* (2013) Biomass use, production, feed efficiencies,

347 and greenhouse gas emissions from global livestock systems. *Proceedings of the*

348 *National Academy of Sciences of the United States of America*, **110**, 20888-20893.

349 Levington Agriculture (1997) A Report for the European Fertiliser Manufacturers

350 Association. Levington Agriculture Ltd., Ipswich, UK, 111 pp.

351 Liu Y, Villalba G, Ayres RU, Schroder H (2008) Global phosphorus flows and

352 environmental impacts from a consumption perspective. *Journal of Industrial*

353 *Ecology*, **12**, 229-247.

354 Ma W, Ma L, Li J *et al.* (2011) Phosphorus flows and use efficiencies in production and

355 consumption of wheat, rice, and maize in China. *Chemosphere*, **84**, 814-821.

356 Mishima S, Endo A, Kohyama K (2010) Recent trends in phosphate balance nationally

357 and by region in Japan. *Nutrient Cycling in Agroecosystems*, **86**, 69-77.

358 MWPS-18 (1985) Livestock Waste Facilities Handbook. Midwest Plan Service,

359 University of Missouri, Ames, IA, USA, 112 pp.

360 OECD Secretariat (1991) National Soil Surface Nutrient Balances, 1985 to 1995.

361 Explanatory Notes. Table 2 Coefficients to convert livestock numbers into manure

362 nitrogen quantities from national sources. Organisation for Economic Cooperation

and Development, Paris.

Ringeval B, Nowak B, Nesme T *et al.* (2014) Contribution of anthropogenic phosphorus to agricultural soil fertility and food production. *Global Biogeochemical Cycles*, **28**, 743–756.

Senthilkumar K, Nesme T, Mollier A *et al.* (2012) Regional-scale phosphorus flows and budgets within France: the importance of agricultural production systems. *Nutrient Cycling in Agroecosystems*, **92**, 145-159, doi: 10.1007/s10705-011-9478-5.

Sheldrick W, Syers JK, Lingard J (2003) Contribution of livestock excreta to nutrient balances. *Nutrient Cycling in Agroecosystems*, **66**, 119-131.

Smil V (2000) Phosphorus in the environment: natural flows and human interferences. *Annual Review of Energy and the Environment*, **25**, 53-88.

Suh S, Yee S (2011) Phosphorus use-efficiency of agriculture and food system in the US. *Chemosphere* **84**, 806-813.

USDA-NRCS (2009) Crop Nutrient Tool: Nutrient Content of Crops. United States Department of Agriculture, Natural Resource Conservation Service, Washington.

Waller JC (2010) Byproducts and unusual feedstuffs. *Feedstuffs*, **9**, 18-22.

Wang R, Balkanski Y, Boucher O *et al.* (2015) Significant contribution of combustion-related emissions to the atmospheric phosphorus budget. *Nature Geoscience*, **8**, 48-54.

Wang R, Tao S, Balkanski Y *et al.* (2014) Exposure to ambient black carbon derived from a unique inventory and high resolution model. *Proceedings of the National*

385        *Academy of Sciences of the United States of America*, **111**, 2459-2463.

386

Table SI-1: Global regions and countries

| Eastern and Southern Africa    | Northern Africa | Western and Central Africa | Eastern Asia           | Southern and Southeastern Asia | Western and Central Asia | Oceania                  | Europe                 | North America    | The Caribbean and Central America | South America    |
|--------------------------------|-----------------|----------------------------|------------------------|--------------------------------|--------------------------|--------------------------|------------------------|------------------|-----------------------------------|------------------|
| Angola                         | Algeria         | Benin                      | China                  | Bangladesh                     | Afghanistan              | American                 | Albania                | Canada           | Anguilla                          | Argentina        |
| Botswana                       | Burkina Faso    | Burundi                    | Japan                  | Bhutan                         | Armenia                  | Samoa                    | Andorra                | Greenland        | Antigua and                       | Bolivia          |
| British Indian Ocean Territory | Chad            | Cameroon                   | Democratic Republic of | Brunei Darussalam              | Azerbaijan               | Australia                | Austria                | Mexico           | Barbuda                           | Brazil           |
|                                | Djibouti        | Cabo Verde                 | People's Republic of   | Cambodia                       | Bahrain                  | Cook Islands             | Belarus                | Saint Pierre and | Aruba                             | Chile            |
|                                | Egypt           | Central African Republic   | Korea                  | India                          | Cyprus                   | Fiji                     | Belgium                |                  | Bahamas                           | Colombia         |
| Comoros                        | Eritrea         | African Republic           | Korea                  | Indonesia                      | Georgia                  | French Polynesia         | Bosnia and Herzegovina | Miquelon         | Barbados                          | Ecuador          |
| Kenya                          | Ethiopia        | Republic of                | Republic of            | Laos                           | Iran                     | Guam                     | Bulgaria               | United States    | Belize                            | Falkland Islands |
| Lesotho                        | Libya           | Congo                      | Korea                  | Malaysia                       | Iraq                     | Kiribati                 | Croatia                |                  | Bermuda                           | French Guiana    |
| Madagascar                     | Mali            | Democratic Republic of     | Mongolia               | Maldives                       | Israel                   | Marshall Islands         | Czech Republic         |                  | British Virgin Islands            | Guyana           |
| Malawi                         | Mauritania      | the Congo                  |                        | Myanmar                        | Jordan                   | Nauru                    | Estonia                |                  | Costa Rica                        | South Georgia    |
| Mauritius                      | Morocco         | Côte d'Ivoire              |                        | Nepal                          | Kuwait                   | New Caledonia            | Faroe Islands          |                  | Cuba                              | and the South    |
| Mozambique                     | Somalia         | Equatorial Guinea          |                        | Pakistan                       | Kyrgyzstan               | New Zealand              | Finland                |                  | Dominica                          | Sandwich         |
| Namibia                        | Sudan           | Guinea                     |                        | Philippines                    | Lebanon                  | Niue                     | France                 |                  | Dominican Republic                | islands          |
| Réunion                        | Tunisia         | Gabon                      |                        | Singapore                      | Oman                     | Northern Mariana Islands | Germany                |                  | El Salvador                       | Suriname         |
| Seychelles                     | Western Sahara  | Gambia                     |                        | Sri Lanka                      | Qatar                    | Palau                    | Gibraltar              |                  | Guadeloupe                        |                  |
| South Africa                   |                 | Ghana                      |                        | Thailand                       | Saudi Arabia             | Papua New Guinea         | Greece                 |                  | Grenada                           | Venezuela        |
| Swaziland                      |                 | Guinea-Bissau              |                        | Timor-Leste                    | Syrian Arab Republic     |                          | Hungary                |                  |                                   |                  |
| Tanzania                       |                 |                            |                        | Vietnam                        | Tajikistan               |                          | Iceland                |                  |                                   |                  |
| Uganda                         |                 |                            |                        |                                | Turkey                   | Pitcairn Islands         |                        |                  |                                   |                  |
| Zambia                         |                 | Liberia                    |                        |                                |                          |                          |                        |                  |                                   |                  |

|          |              |              |                |               |                   |
|----------|--------------|--------------|----------------|---------------|-------------------|
| Zimbabwe | Nigeria      | Turkmenistan | Samoa          | Italy         | Honduras          |
|          | Rwanda       | n            | Solomon        | Latvia        | Jamaica           |
|          | São Tome and | United Arab  | Islands        | Liechtenstein | Martinique        |
|          | Principe     | Emirates     | Tokelau        | Lithuania     | Montserrat        |
|          | Senegal      | Uzbekistan   | Tonga          | Luxembourg    | Netherlands       |
|          | Sierra Leone | Yemen        | Tuvalu         | Macedonia     | Antilles          |
|          | Saint Helena |              | Vanuatu        | Malta         | Nicaragua         |
|          | Togo         |              | Wallis and     | Moldova       | Panama            |
|          |              |              | Futuna Islands | Monaco        | Puerto Rico       |
|          |              |              |                | Netherlands   | Saint Kitts and   |
|          |              |              |                | Norway        | Nevis             |
|          |              |              |                | Poland        | Saint Lucia       |
|          |              |              |                | Portugal      | Saint Vincent and |
|          |              |              |                | Romania       | the Grenadines    |
|          |              |              |                | Russia        | Trinidad and      |
|          |              |              |                | San Marino    | Tobago            |
|          |              |              |                | Serbia        | Turks and Caicos  |
|          |              |              |                | Montenegro    | Islands           |
|          |              |              |                | Slovakia      |                   |
|          |              |              |                | Slovenia      |                   |
|          |              |              |                | Spain         |                   |
|          |              |              |                | Sweden        |                   |
|          |              |              |                | Switzerland   |                   |
|          |              |              |                | Ukraine       |                   |
|          |              |              |                | United        |                   |
|          |              |              |                | Kingdom       |                   |

Table SI-2: Crop categories and their P contents

| Category         | P content (% w/w)                                                                   | Items                                                                                                                                                                                                                                                                                                                                                                                                                                                                                                                                                                                                                                                                                                                                                                                                                                                                                                           |
|------------------|-------------------------------------------------------------------------------------|-----------------------------------------------------------------------------------------------------------------------------------------------------------------------------------------------------------------------------------------------------------------------------------------------------------------------------------------------------------------------------------------------------------------------------------------------------------------------------------------------------------------------------------------------------------------------------------------------------------------------------------------------------------------------------------------------------------------------------------------------------------------------------------------------------------------------------------------------------------------------------------------------------------------|
| Wheat            | 0.38                                                                                | wheat                                                                                                                                                                                                                                                                                                                                                                                                                                                                                                                                                                                                                                                                                                                                                                                                                                                                                                           |
| Rice             | 0.25                                                                                | rice                                                                                                                                                                                                                                                                                                                                                                                                                                                                                                                                                                                                                                                                                                                                                                                                                                                                                                            |
| Maize            | 0.18 (0.09–0.27)                                                                    | maize                                                                                                                                                                                                                                                                                                                                                                                                                                                                                                                                                                                                                                                                                                                                                                                                                                                                                                           |
| Other cereals    | 0.31 (0.29–0.34)                                                                    | rye, oats, millet, sorghum, triticale, canary seeds, buckwheat, quinoa, fonio, mixed grains, cereals nes                                                                                                                                                                                                                                                                                                                                                                                                                                                                                                                                                                                                                                                                                                                                                                                                        |
| Soybeans         | 0.60                                                                                | soybeans                                                                                                                                                                                                                                                                                                                                                                                                                                                                                                                                                                                                                                                                                                                                                                                                                                                                                                        |
| Oil palms        | 0.54                                                                                | palm oil and kernels                                                                                                                                                                                                                                                                                                                                                                                                                                                                                                                                                                                                                                                                                                                                                                                                                                                                                            |
| Other oil crops  | 0.06 (0.04–0.08)                                                                    | olives, sunflower seeds, sesame seeds, seed cotton, cottonseed, linseed, groundnuts with shells, oilseed rape, coconuts, castor oil seeds, tung nuts, safflower seeds, mustard seeds, poppy seeds, oilseeds nes, melon seeds, hemp seeds, tallowtree seeds, karite nuts (sheanuts), kapok fruit, jojoba seeds                                                                                                                                                                                                                                                                                                                                                                                                                                                                                                                                                                                                   |
| Sugar crops      | 0.05 (0.04–0.06)                                                                    | sugar beets, sugar cane, sugar crops nes                                                                                                                                                                                                                                                                                                                                                                                                                                                                                                                                                                                                                                                                                                                                                                                                                                                                        |
| Fiber            | 0.67                                                                                | seed cotton, cotton lint, other bast fibers, sisal, flax and tow fiber, fiber crops nes, jute, ramie, hemp tow waste, agave fibers nes, manila fiber (abaca), kapok fruit                                                                                                                                                                                                                                                                                                                                                                                                                                                                                                                                                                                                                                                                                                                                       |
| Roots and tubers | 0.07 (0.04–0.09)                                                                    | potatoes, cassava, taro (cocoyam), yams, sweet potatoes, yautia (cocoyam), roots and tubers nes                                                                                                                                                                                                                                                                                                                                                                                                                                                                                                                                                                                                                                                                                                                                                                                                                 |
| Vegetables       | 0.06 (0.05–0.07)                                                                    | cabbages and other brassicas, tomatoes, cauliflowers and broccoli, cucumbers and gherkins, dry onions, garlic, green peas, carrots and turnips, fresh vegetables nes, watermelons, other melons (including cantaloupes), spinach, pumpkins, squash and gourds, eggplants (aubergines), chili and green peppers, onions and green shallots, leeks and other alliaceous vegetables, green beans, leguminous vegetables nes, okra, mushrooms and truffles, artichokes, maize greens, asparagus, string beans, lettuce and chicory, cassava leaves                                                                                                                                                                                                                                                                                                                                                                  |
| Fruit            | 0.02 (0.01–0.04)                                                                    | Apples, pears, apricots, cherries, peaches and nectarines, plums and sloes, stone fruits nes, berries nes, grapes, tropical fresh fruit nes, fresh fruit nes, oranges, citrus fruit nes, figs, quinces, sour cherries, carobs, tangerines, mandarins, clementines, satsumas, lemons and limes, grapefruit (incl. pomelos), dates, bananas, pineapples, mangoes, mangosteens, guavas, strawberries, avocados, papayas, raspberries, currants, persimmons, kiwi fruit, gooseberries, plantains, cashewapple, blueberries, cranberries, pome fruits nes                                                                                                                                                                                                                                                                                                                                                            |
| Other crops      | 0.43 for pulses, 0.41 for nuts, 0.03 for stimulants and spices, and 0.15 for others | dry beans, dry peas, lentils, forage and silage (maize, grasses nes, alfalfa, clover, sorghum, green oilseeds, legumes, rye grass), forage products, vegetables and root fodder, tobacco (unmanufactured), pulses nes, almonds with shells, walnuts with shells, pistachios, nuts nes, anise, badian, fennel, coriander, broad beans, dry horse beans, vetches, chestnuts, hops, spices nes, chick peas, groundnuts with shells, beets for fodder, chilies and dry peppers, cocoa beans, coffee greens, lupins, tea, maté, peppermint, pigeon peas, natural rubber, Brazil nuts with shells, nutmeg mace, cardamoms, areca nuts, ginger, dry cow peas, bambara beans, kola nuts, hazelnuts with shells, pepper ( <i>Piper</i> spp.), natural gums, cinnamon (canella), cloves, chicory roots, cabbage for fodder, teas nes, carrots for fodder, vanilla, dried pyrethrum, swedes for fodder, turnips for fodder |

393  
394

Table SI-3: P:N ratios in manure and the P contents of livestock and their products.

| Livestock and products | P:N ratio for livestock manure | P content of livestock and their products (% w/w) |
|------------------------|--------------------------------|---------------------------------------------------|
| Buffaloes              | 0.18 (0.13-0.24)               | 0.21                                              |
| Cattle, dairy          | 0.18 (0.13-0.24)               | 0.21                                              |
| Cattle, non-dairy      | 0.18 (0.13-0.24)               | 0.21                                              |
| Sheep                  | 0.15 (0.09-0.23)               | 0.16                                              |
| Goats                  | 0.15 (0.09-0.23)               | 0.16                                              |
| Swine, market          | 0.28 (0.23-0.35)               | 0.56                                              |
| Swine, breeding        | 0.28 (0.23-0.35)               | 0.56                                              |
| Chickens, layers       | 0.24 (0.13-0.35)               | 0.15                                              |
| Chickens, broilers     | 0.24 (0.13-0.35)               | 0.15                                              |
| Turkeys                | 0.25 (0.21-0.29)               | 0.15                                              |
| Horses                 | 0.19 (0.18-0.21)               | 0.17                                              |
| Donkeys                | 0.19 (0.18-0.21)               | 0.17                                              |
| Mules                  | 0.19 (0.18-0.22)               | 0.17                                              |
| Camels                 | 0.19 (0.18-0.23)               | 0.17                                              |
| Ducks                  | 0.25 (0.21-0.29)               | 0.15                                              |
| Llamas                 | 0.19 (0.18-0.25)               | 0.17                                              |
| Eggs                   | -                              | 0.26                                              |
| Milk                   | -                              | 0.093                                             |

395  
396  
397  
398  
399  
400  
401  
402  
403  
404  
405  
406  
407  
408  
409  
410  
411

Source:

1. ASAE (2005) Manure production and characteristics. Report D384.2, American Society of Agricultural Engineers, St. Joseph, MI, USA.
2. COMIFER (2007) Teneur en P, K et Mg des organes végétaux récoltés pour les cultures de plein champ et les principaux fourrages. Comité Français d'Étude et de Développement de la Fertilisation Raisonnée, Paris. (in French)
3. Levington Agriculture (1997) A Report for the European Fertiliser Manufacturers Association. Levington Agriculture Ltd., Ipswich, UK, 111 pp.
4. MWPS-18 (1985) Livestock Waste Facilities Handbook. Midwest Plan Service, University of Missouri, Ames, IA, USA, 112 pp.
5. OECD Secretariat (1991) National Soil Surface Nutrient Balances, 1985 to 1995. Explanatory Notes. Table 2 Coefficients to convert livestock numbers into manure nitrogen quantities from national sources. Organisation for Economic Cooperation and Development, Paris.
6. Sheldrick W, Syers JK, Lingard J (2003) Contribution of livestock excreta to nutrient balances. Nutrient Cycling in Agroecosystems, 66, 119-131.

Table SI-4: Equations and data sources used in this study

| Pool       | Flow                        | Abbreviation     | Method                                             | Period    | Data Source                            | Parameters                  |
|------------|-----------------------------|------------------|----------------------------------------------------|-----------|----------------------------------------|-----------------------------|
| Phosphate  | Phosphate acid              | $P_{pa}$         | $P_{pa} = P_{P2O5\%} \times PA$                    | 2002–2010 | Phosphate acid production from IFA     | P fraction of P in $P_2O_5$ |
|            | Fertilizer                  | $P_{fer}$        | $P_{fer} = P_{P2O5\%} \times Fer$                  | 2002–2010 | Fertilizer consumption from FAO        | P fraction of P in $P_2O_5$ |
|            | Feed additives              | $P_{feed-add}$   | $P_{feed-add} = 8\% \times P_{pa}$                 | 2002–2010 | —                                      | —                           |
|            | Detergent and other         | $P_{det}$        | $P_{det} = P_{pa} - P_{fer} - P_{feed-add}$        | 2002–2010 | —                                      | —                           |
| Atmosphere | Deposition to cropland      | $P_{dep-crop}$   | PKU-FUEL Model                                     | 2007      | —                                      | —                           |
|            | Deposition to pasture grass | $P_{dep-grass}$  | PKU-FUEL Model                                     | 2007      | —                                      | —                           |
| Cropland   | Cropland field burning      | $P_{crop-bur}$   | PKU-FUEL Model                                     | 2007      | —                                      | —                           |
|            | Bioenergy emission          | $P_{bioener}$    | PKU-FUEL Model                                     | 2007      | —                                      | —                           |
|            | Crop production             | $P_{crop}$       | $P_{crop} = Crop \times P_{crop\%}$                | 2002–2010 | Crop production from FAO               | P fraction of crops         |
|            | Crops as food               | $P_{crop-food}$  | $P_{crop-food} = Crop-Food \times P_{crop\%}$      | 2002–2010 | Crop production as food from FAO       | P fraction of crops         |
|            | Crops as feed               | $P_{crop-feed}$  | $P_{crop-feed} = Crop-Feed \times P_{crop\%}$      | 2002–2010 | Crop production as feed from FAO       | P fraction of crops         |
|            | Crops as seed               | $P_{crop-seed}$  | $P_{crop-seed} = Crop-Seed \times P_{crop\%}$      | 2002–2010 | Crop production as seed from FAO       | P fraction of crops         |
|            | Crops as processing         | $P_{crop-pro}$   | $P_{crop-pro} = Crop-Processing \times P_{crop\%}$ | 2002–2010 | Crop production as processing from FAO | P fraction of crops         |
|            | Crops as waste              | $P_{crop-waste}$ | $P_{crop-waste} = Crop-Waste \times P_{crop\%}$    | 2002–2010 | Crop production as waste from FAO      | P fraction of crops         |
|            | Crops as other uses         | $P_{crop-oth}$   | $P_{crop-oth} = Crop-Other Use \times P_{crop\%}$  | 2002–2010 | Crop production as other use from FAO  | P fraction of crops         |



|           |                                    |                           |                                                                                                                                                                                                                                                             |           |                                                        |                                                       |
|-----------|------------------------------------|---------------------------|-------------------------------------------------------------------------------------------------------------------------------------------------------------------------------------------------------------------------------------------------------------|-----------|--------------------------------------------------------|-------------------------------------------------------|
|           | Crop residues recycled to cropland | $P_{\text{res-ret}}$      | $P_{\text{res-ret}} = \text{Residues-Return} \times P_{\text{crop}}\%$                                                                                                                                                                                      | 2002–2010 | Crop residues production returned to cropland from FAO | P fraction of crop residues                           |
|           | Total crop residues                | $P_{\text{crop-res}}$     | $P_{\text{crop-res}} = P_{\text{res-ret}}/50\%$                                                                                                                                                                                                             | 2002–2010 | –                                                      | –                                                     |
|           | Crop residues as feed              | $P_{\text{res-feed}}$     | $P_{\text{res-feed}} = P_{\text{crop-res}} \times 25\%$                                                                                                                                                                                                     | 2002–2010 | –                                                      | –                                                     |
|           | Crop residues to human             | $P_{\text{res-hum}}$      | $P_{\text{res-hum}} = P_{\text{crop-res}} - P_{\text{res-ret}} - P_{\text{res-feed}} - P_{\text{crop-bur}}$                                                                                                                                                 | 2002–2010 | –                                                      | –                                                     |
|           | Cropland runoff                    | $P_{\text{run-crop}}$     | $P_{\text{run-crop}} = 12.5\% \times (P_{\text{fer-crop}} + P_{\text{dep-crop}} + P_{\text{livman-crop}} + P_{\text{man-hum}} + P_{\text{res-ret}})$                                                                                                        | 2002–2010 | –                                                      | –                                                     |
| Pasture   | Grass as feed                      | $P_{\text{grass}}$        | ORCHIDEE Model                                                                                                                                                                                                                                              | 2002–2010 | –                                                      | P fraction of grass and forage                        |
|           | Pasture runoff                     | $P_{\text{run-grass}}$    | $P_{\text{run-crop}} = 12.5\% \times (P_{\text{fer-pas}} + P_{\text{dep-pas}} + P_{\text{livman-pas}})$                                                                                                                                                     | 2002–2010 | –                                                      | –                                                     |
| Livestock | Manure to cropland                 | $P_{\text{manliv-crop}}$  | $P_{\text{manliv-crop}} = N_{\text{Manure-Crop}} \times P\%/N\%$                                                                                                                                                                                            | 2002–2010 | Livestock manure production to cropland from FAO       | P fraction of livestock manure to CROPLAND            |
|           | Manure to pasture                  | $P_{\text{manliv-grass}}$ | $P_{\text{manliv-pas}} = N_{\text{Manure-grass}} \times P\%/N\%$                                                                                                                                                                                            | 2002–2010 | Livestock manure production to pasture from FAO        | P fraction of livestock manure to pasture             |
|           | Manure as waste                    | $P_{\text{man-waste}}$    | $P_{\text{manliv-crop}} = N_{\text{Manure-waste}} \times P\%/N\%$                                                                                                                                                                                           | 2002–2010 | Livestock manure production as wastes from FAO         | P fraction of livestock manure as waste               |
|           | Meat                               | $P_{\text{meat}}$         | $P_{\text{meat}} = \text{Meat} \times P_{\text{meat}}\%$                                                                                                                                                                                                    | 2002–2010 | Meat production from FAO                               | P fraction of meat                                    |
|           | Eggs                               | $P_{\text{egg}}$          | $P_{\text{egg}} = \text{Eggs} \times P_{\text{egg}}\%$                                                                                                                                                                                                      | 2002–2010 | Egg production from FAO                                | P fraction of egg                                     |
|           | Milk                               | $P_{\text{milk}}$         | $P_{\text{milk}} = \text{Milk} \times P_{\text{milk}}\%$                                                                                                                                                                                                    | 2002–2010 | Milk production from FAO                               | P fraction of milk                                    |
|           | Feed from human food waste         | $P_{\text{feed}}$         | $P_{\text{pro-feed}} = (P_{\text{meat}} + P_{\text{egg}} + P_{\text{milk}} + P_{\text{manliv-crop}} + P_{\text{manliv-gpas}} + P_{\text{man-pas}}) - (P_{\text{fee-add}} + P_{\text{res-feed}} + P_{\text{crop-feed}} + P_{\text{grass}} + P_{\text{for}})$ | 2002–2010 | –                                                      | –                                                     |
| Humans    | Human excreta as manure to crops   | $P_{\text{man-hum}}$      | $P_{\text{man-hum}} = \text{Excreta-Human} \times (70\% \times \text{Population}_{\text{rural}})$                                                                                                                                                           | 2002–2010 | Rural and urban population from FAO                    | P fraction of human excreta, human excreta production |

|                                   |                        |                                                                                                                             |           |   |  |   |
|-----------------------------------|------------------------|-----------------------------------------------------------------------------------------------------------------------------|-----------|---|--|---|
|                                   |                        | $+ 30\% \times Population_{urban})$                                                                                         |           |   |  |   |
| Human excreta as<br>manure wasted | $P_{exchum-}$<br>waste | $P_{exchum-waste} = Excreta-Human \times (30\% \times$<br>$Population_{rural}$<br>$+ 70\% \times Population_{urban})$       | 2002–2010 | — |  | — |
| Waste from humans                 | $P_{waste-}$<br>hum    | $P_{waste-hum} = [(P_{crop} - P_{crop-seed}) + (P_{meat} +$<br>$P_{egg} + P_{milk} + P_{det})] - P_{man-hum} - P_{bioener}$ | 2002–2010 | — |  | — |

Source:

1. IFA, <http://www.fertilizer.org/Statistics>
2. FAO, <http://www.fao.org/faostat/en/#home>
3. Antikainen R, Lemola R, Nousiainen J et al. (2005) Stocks and flows of nitrogen and phosphorus in the Finnish food production and consumption system. Agriculture, Ecosystems and Environment, 107, 287-305.
4. ASAE (2005) Manure production and characteristics. Report D384.2, American Society of Agricultural Engineers, St. Joseph, MI, USA.
5. COMIFER (2007) Teneur en P, K et Mg des organes végétaux récoltés pour les cultures de plein champ et les principaux fourrages. Comité Français d'Étude et de Développement de la Fertilisation Raisonnée, Paris. (in French)
6. Herrero M, Havlik P, Valin H et al. (2013) Biomass use, production, feed efficiencies, and greenhouse gas emissions from global livestock systems. Proceedings of the National Academy of Sciences of the United States of America, 110, 20888-20893.
7. Levington Agriculture (1997) A Report for the European Fertiliser Manufacturers Association. Levington Agriculture Ltd., Ipswich, UK, 111 pp.
8. Liu Y, Villalba G, Ayres RU, Schroder H (2008) Global phosphorus flows and environmental impacts from a consumption perspective. Journal of Industrial Ecology, 12, 229-247.
9. MWPS-18 (1985) Livestock Waste Facilities Handbook. Midwest Plan Service, University of Missouri, Ames, IA, USA, 112 pp.
10. OECD Secretariat (1991) National Soil Surface Nutrient Balances, 1985 to 1995. Explanatory Notes. Table 2 Coefficients to convert livestock numbers into manure nitrogen quantities from national sources. Organisation for Economic Cooperation and Development, Paris.
11. USDA-NRCS (2009) Crop Nutrient Tool: Nutrient Content of Crops. United States Department of Agriculture, Natural Resource Conservation Service, Washington.
12. Waller JC (2010) Byproducts and unusual feedstuffs. Feedstuffs, 9, 18-22.
13. Wang R, Balkanski Y, Boucher O et al. (2015) Significant contribution of combustion-related emissions to the atmospheric phosphorus budget. Nature Geoscience, 8, 48-54.
14. Wang R, Tao S, Balkanski Y et al. (2014) Exposure to ambient black carbon derived from a unique inventory and high resolution model. Proceedings of the National Academy of Sciences of the United States of America, 111, 2459-2463.

Table SI-5: Ranges of cropland P fluxes used in the uncertainty analysis and for comparison with other previous studies.

| Fertilizer inputs <sup>1-3</sup> | Total input (Tg P yr <sup>-1</sup> )        |                                                |                                                   | Deposition <sup>1-6</sup> | Total output (Tg P yr <sup>-1</sup> ) |                                        |                                 |
|----------------------------------|---------------------------------------------|------------------------------------------------|---------------------------------------------------|---------------------------|---------------------------------------|----------------------------------------|---------------------------------|
|                                  | Livestock manure to cropland <sup>2,3</sup> | Human sewage sludge to cropland <sup>1,3</sup> | Recycled crop residues to cropland <sup>1-3</sup> |                           | Harvested crops <sup>1-5</sup>        | Harvested crop residues <sup>1-2</sup> | Leaching or runoff <sup>6</sup> |
| 13.7–15.0                        | 6.0–8.0                                     | 1.3–1.5                                        | 1.0–3.5                                           | 0.6–1.0                   | 8.2–12.3                              | 3.8–6.7                                | 3.2–4.0                         |

Note: For Research, the global flows and budget was in the year 2000.

Source: 1. Liu et al., 2008; 2. Smil, 2000; 3. Cordell et al., 2009; 4. MacDonald et al., 2011; 5. Bouwman et al., 2009; 6. Bouwman et al., 2011.

442

443

444 Table SI-6: Cropland total PUE and PUE (excluding residues for cropland and manure  
 445 for livestock) at the global and regional levels.

|                                | Cropland |           |                | Livestock   |               |                     |
|--------------------------------|----------|-----------|----------------|-------------|---------------|---------------------|
|                                | PUE      | Total PUE | Soil P balance | Total PUE : | Livestock PUE | Livestock total PUE |
|                                |          |           |                | PUE         |               |                     |
|                                |          |           |                | ratio       |               |                     |
| World                          | 0.46     | 0.76      | 4.68           | 1.65        | 0.06          | 0.83                |
| Eastern and Southern Africa    | 0.80     | 1.26      | −1.03          | 1.58        | 0.02          | 0.92                |
| Northern Africa                | 0.84     | 1.48      | −1.48          | 1.76        | 0.02          | 0.95                |
| Western and Central Africa     | 1.51     | 2.28      | −2.72          | 1.51        | 0.01          | 0.92                |
| Eastern Asia                   | 0.27     | 0.44      | 23.45          | 1.63        | 0.08          | 0.81                |
| Southern and Southeastern Asia | 0.43     | 0.77      | 4.14           | 1.79        | 0.05          | 0.78                |
| Western and Central Asia       | 0.64     | 1.09      | 0.22           | 1.70        | 0.04          | 0.69                |
| Oceania                        | 0.31     | 0.51      | 5.17           | 1.65        | 0.04          | 0.93                |
| Europe                         | 0.54     | 0.88      | 2.78           | 1.63        | 0.09          | 0.78                |
| North America                  | 0.57     | 0.99      | 1.46           | 1.74        | 0.08          | 0.89                |
| Caribbean and Central America  | 0.53     | 0.69      | 3.79           | 1.30        | 0.03          | 0.78                |
| South America                  | 0.63     | 0.88      | 2.25           | 1.40        | 0.03          | 0.84                |

446

447

Table SI-7: Cropland total PUE and cropland PUE (excluding residues) for different crops

|           |                  | Cropland PUE | Cropland total PUE | Cropland PUE : cropland total PUE ratio |
|-----------|------------------|--------------|--------------------|-----------------------------------------|
| Cereals   | Wheat            | 0.55         | 1.06               | 1.93                                    |
|           | Rice             | 0.33         | 0.90               | 2.73                                    |
|           | Maize            | 0.36         | 0.90               | 2.50                                    |
|           | Other cereals    | 0.70         | 1.43               | 2.04                                    |
| Oil crops | Soybean          | 0.73         | 0.96               | 1.32                                    |
|           | Oil palm         | 0.24         | 0.24               | 1.0                                     |
|           | Other oil crops  | 0.60         | 0.60               | 1.0                                     |
|           | Sugar crops      | 0.83         | 0.83               | 1.0                                     |
|           | Fiber            | 0.19         | 0.19               | 1.0                                     |
|           | Roots and tubers | 0.54         | 0.69               | 1.28                                    |
|           | Fruits           | 0.10         | 0.10               | 1.0                                     |
|           | Vegetables       | 0.25         | 0.28               | 1.12                                    |
|           | Other crops      | 0.52         | 0.52               | 1.0                                     |

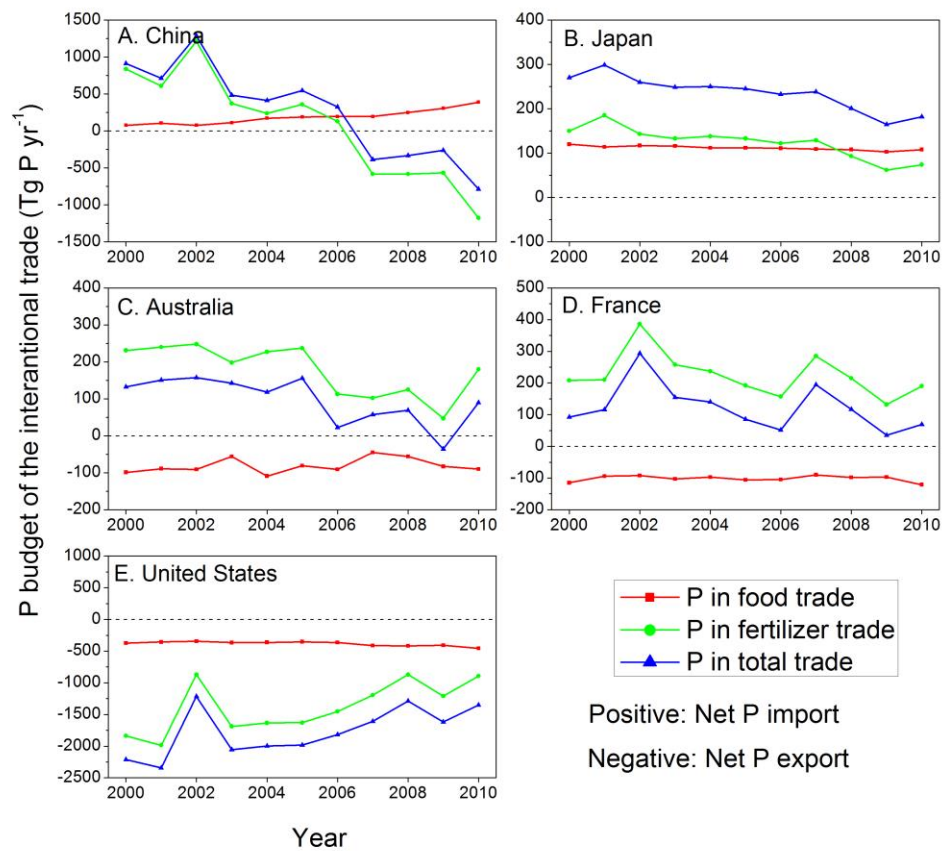

456

457 Figure SI-1: Flows of P in international trade for (A) China, (B) Japan, (C) Australia,  
458 (D) France, and (E) the United States from 2000 to 2010. Positive values represent net  
459 imports; negative values represent net exports.

460

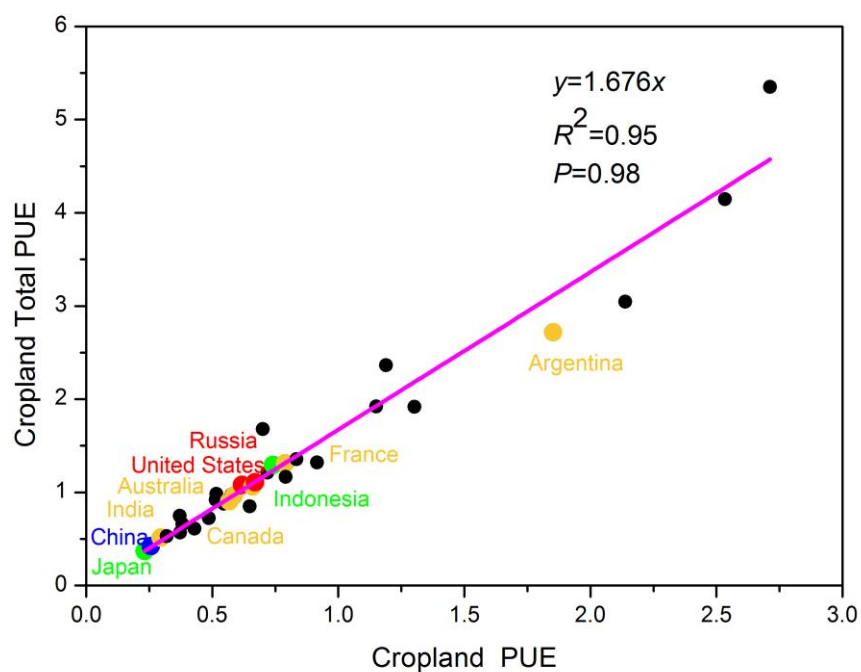

Figure SI-2: The relationship between cropland total PUE (harvested crops + residues) and cropland PUE (harvested crops, excluding residues) for 35 large countries.

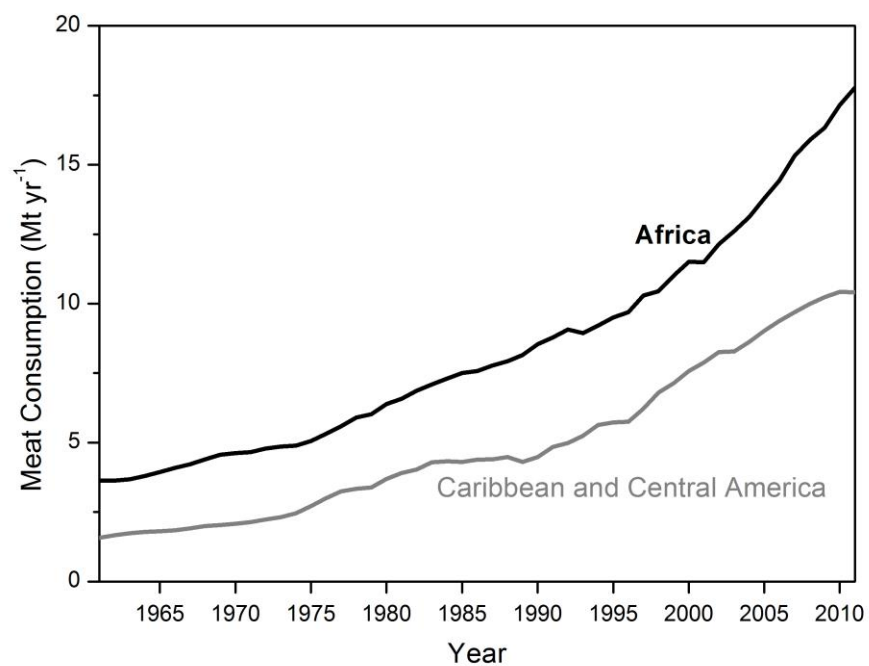

466

467 Figure SI-3: Changes in meat consumption in Africa and in the Caribbean and Central  
 468 America region between 1961 and 2011

469
